# Supplementary material for: Flexible inkjet printed high-k HfO2-based MIM capacitors
Source: Royal Society of Chemistry journal article supplement (doi:10.1039/c5tc03307a), 2016-01-01
Supplement: c5tc03307a1.pdf [file c5tc03307a1.pdf]

Electronic Supplementary Information for JMCC

**SUPPORTING INFORMATION**

**Flexible Inkjet Printed high-k HfO<sub>2</sub>-Based MIM Capacitors**

G. Vescio,<sup>a</sup> J. López-Vidrier,<sup>a</sup> R. Leghrib,<sup>b</sup> A. Cornet <sup>a</sup> and A. Cirera <sup>a</sup>

*MIND/IN2UB Electronics Department, Universitat de Barcelona, c/ Martí i Franquès 1,  
Planta 2, 08028, Barcelona, Spain.*

email: [gvescio@el.ub.edu](mailto:gvescio@el.ub.edu)

***This PDF file includes:***

Figs. S1 to S08

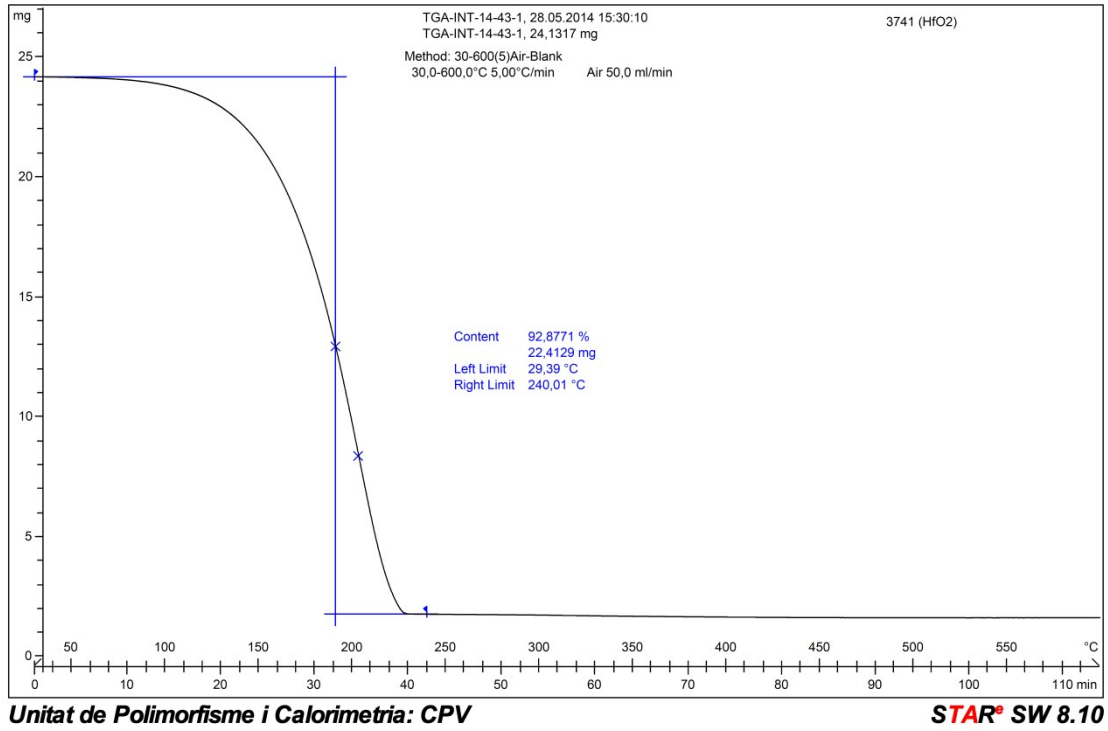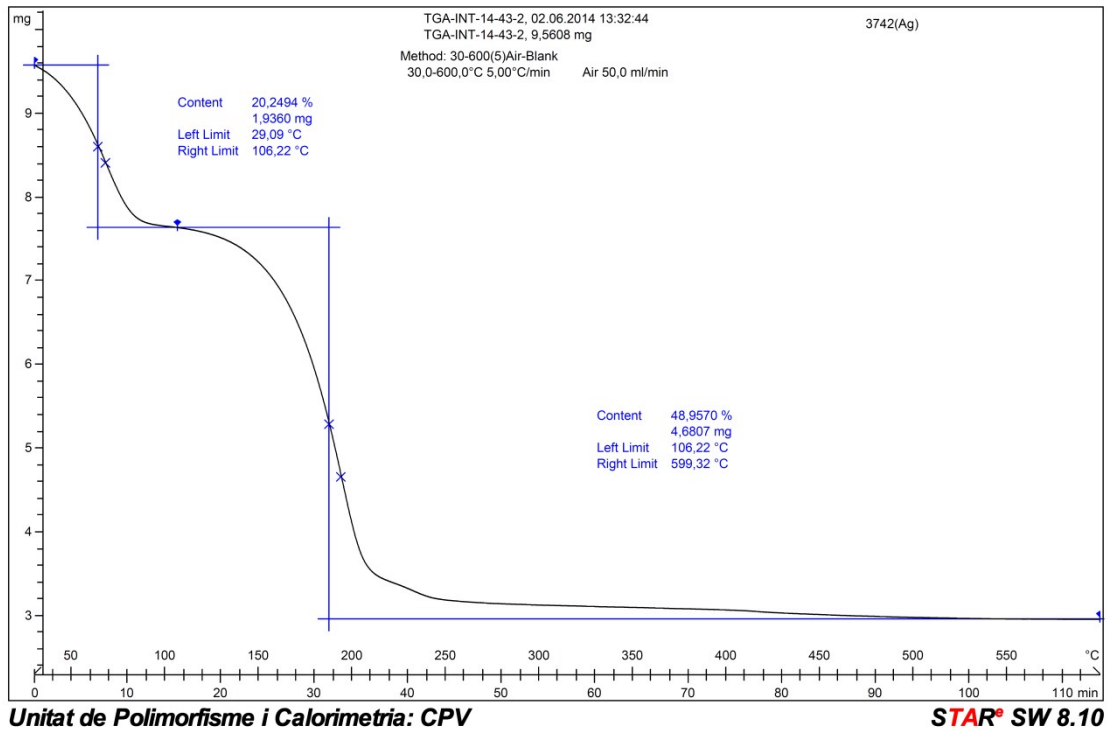

Fig. S1 Thermogravimetry analysis (TGA) of HfO<sub>2</sub> and Ag inks.

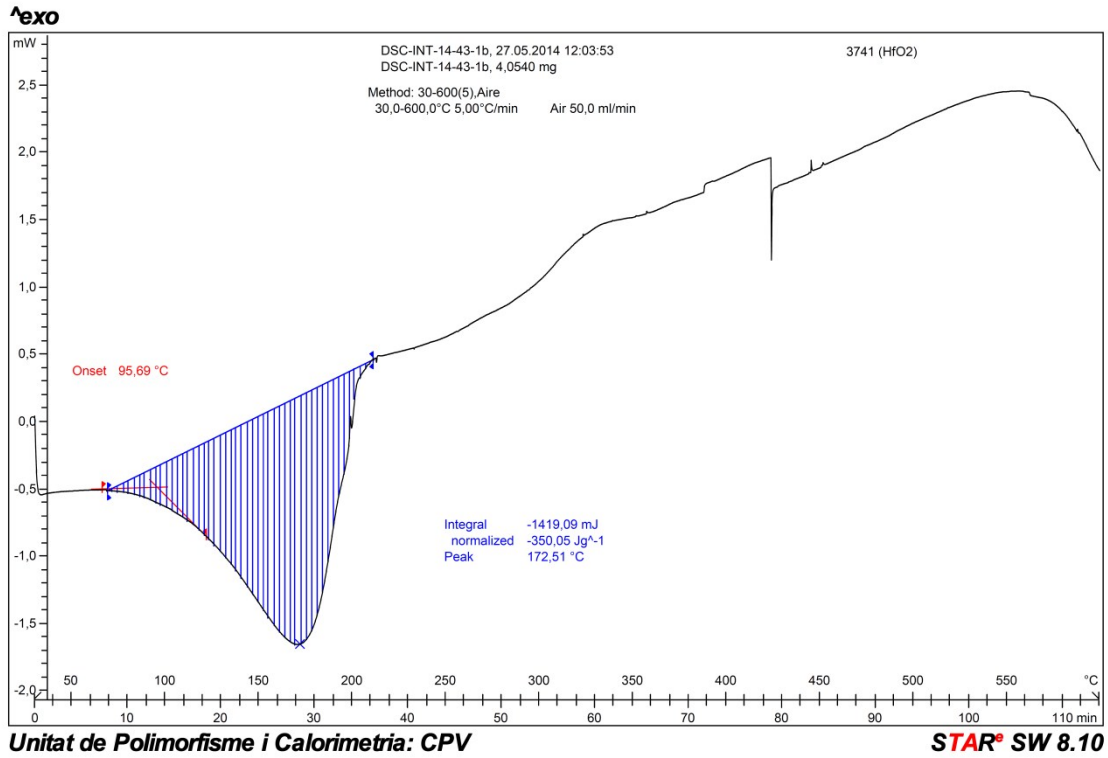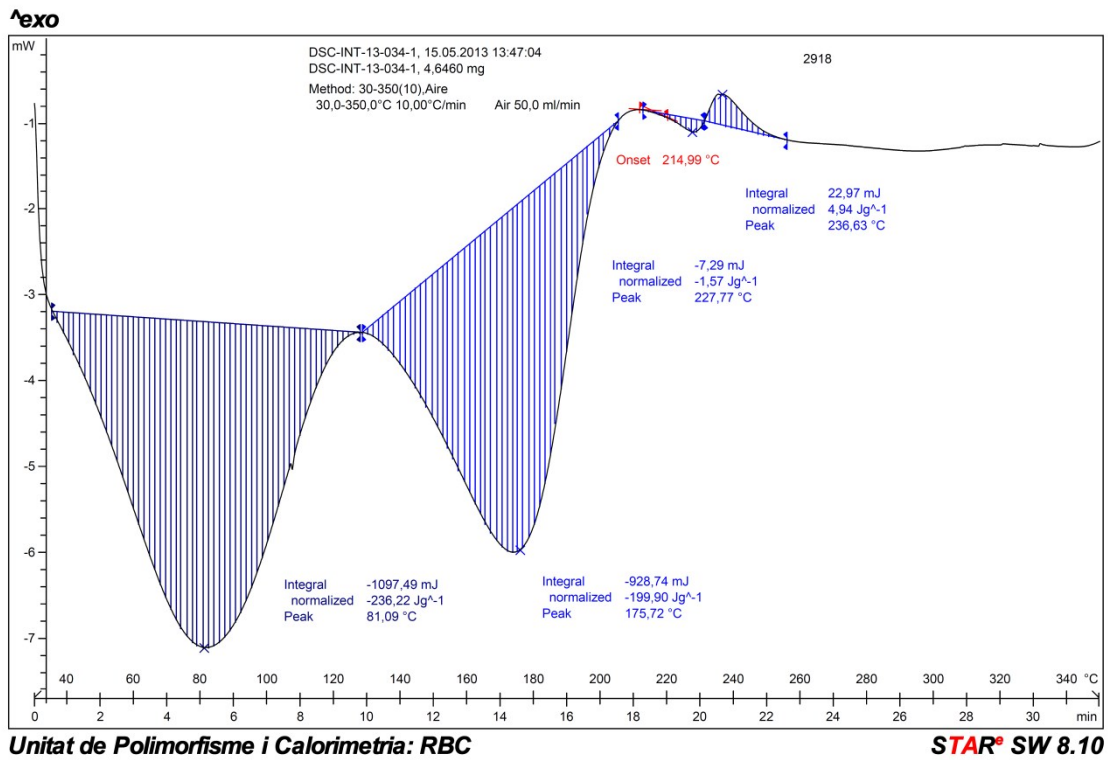

Fig. S2 Differential scanning calorimetry (DSC) measurement of HfO<sub>2</sub> and Ag inks.

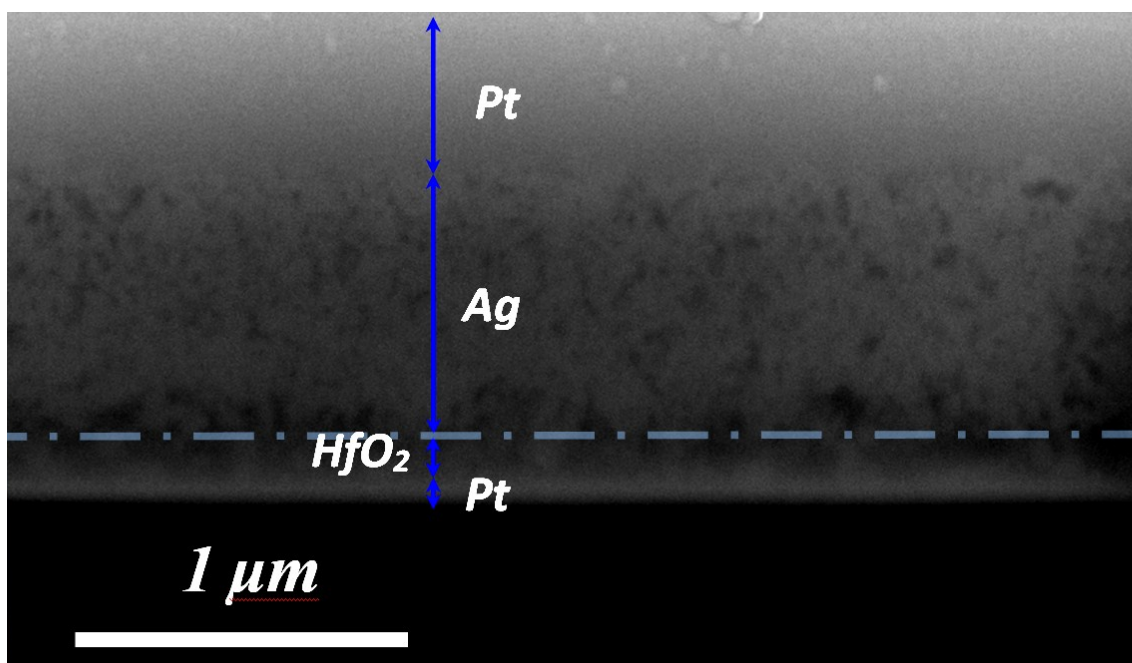

**Fig. S3** Cross-section of MIM capacitor by FIB-assisted FE-SEM technique. The as-deposited layers have a Pt bottom electrode thickness of 50 nm, 120 nm for HfO<sub>2</sub> and 700 nm of Ag top contact.

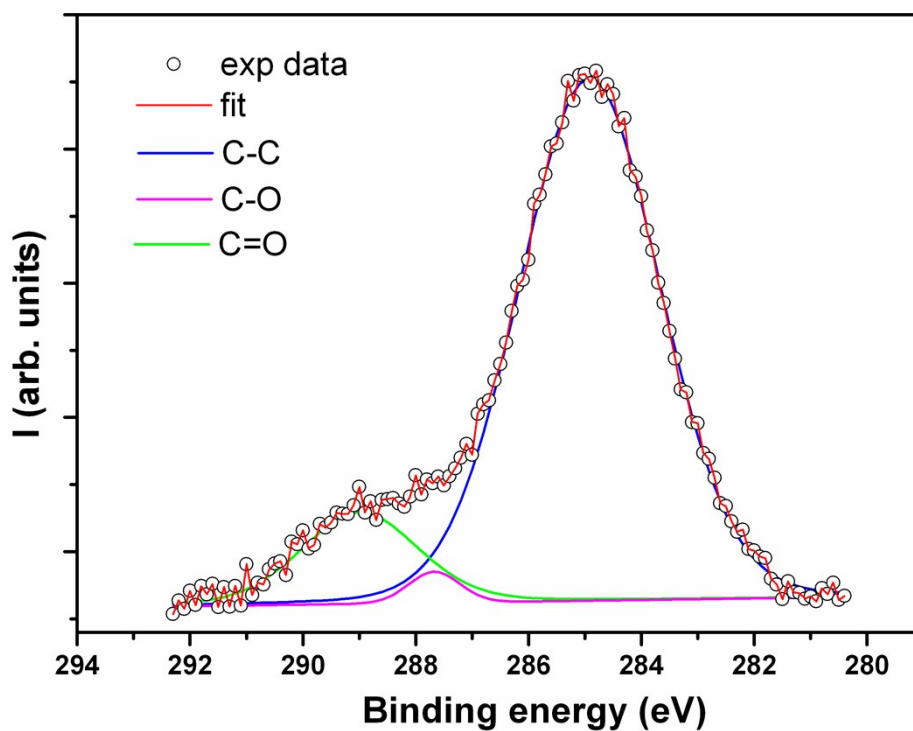

**Fig. S4** XPS Binding Energy High-Resolution spectra of C in annealed HfO<sub>2</sub> thin film at 250 °C for 2 h, deposited on Ag bottom contact. The curve represents the experimental data with the corresponding peaks fitting.

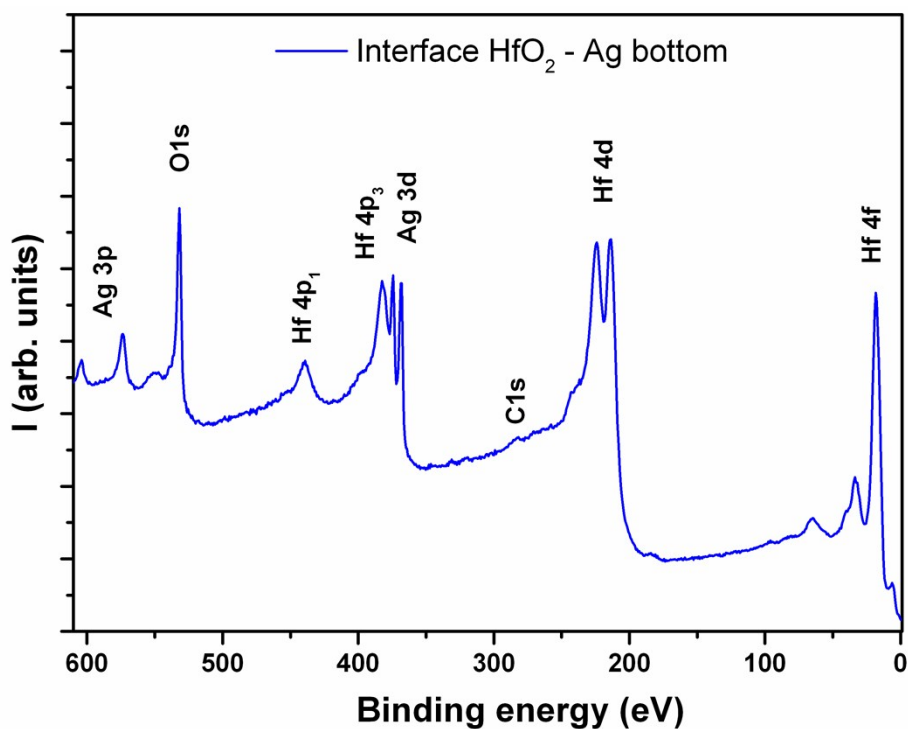

**Fig. S5** XPS Binding Energy Survey spectra at the interface of the structure HfO<sub>2</sub>/Ag bottom contact.

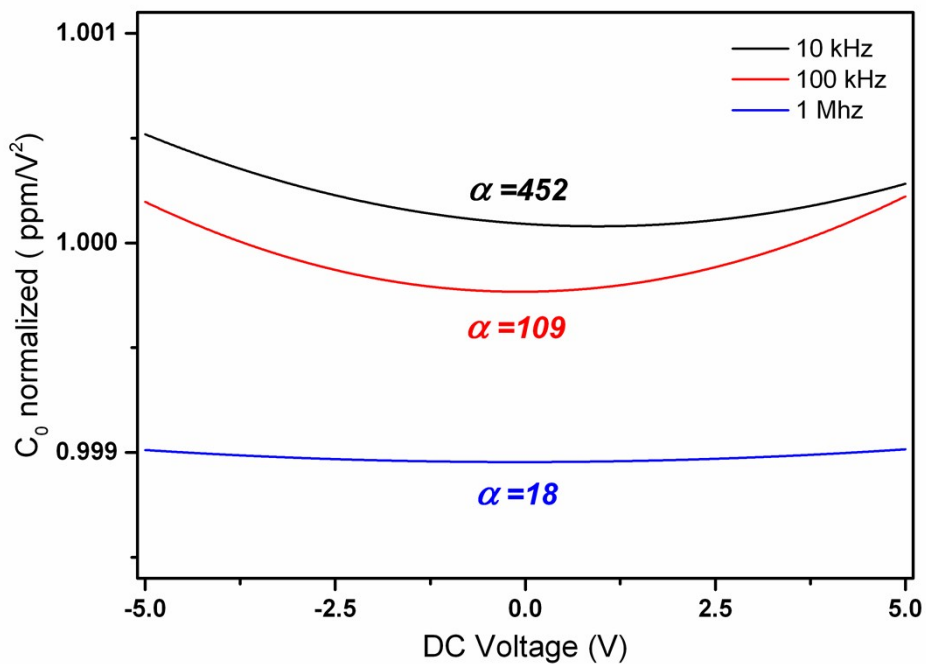

**Fig. S6** Normalized capacitance-frequency dependence of an inkjet-printed Ag/HfO<sub>2</sub>/Ag MIM capacitor.

a)

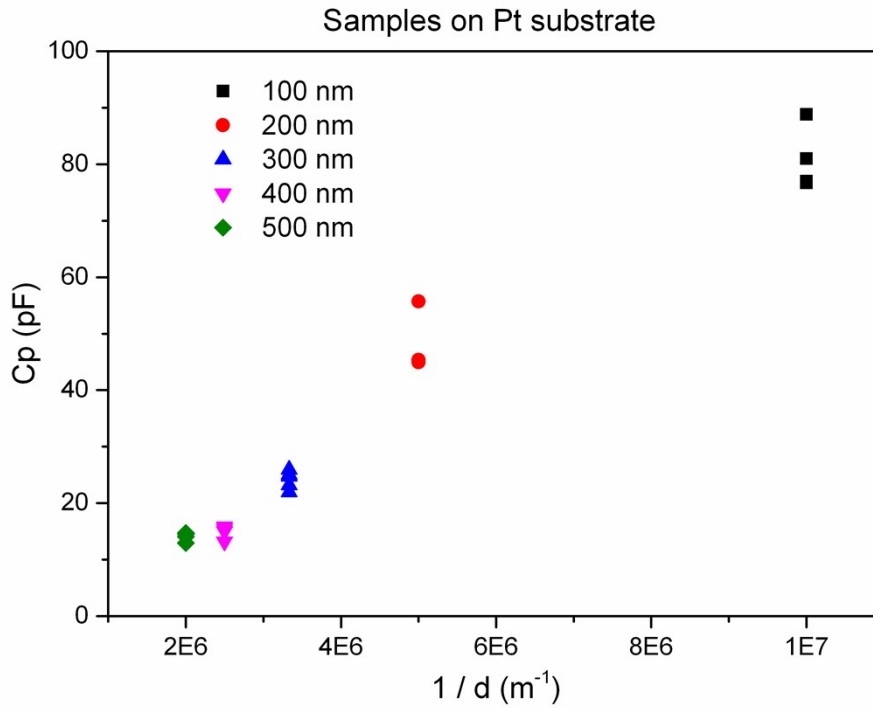

b)

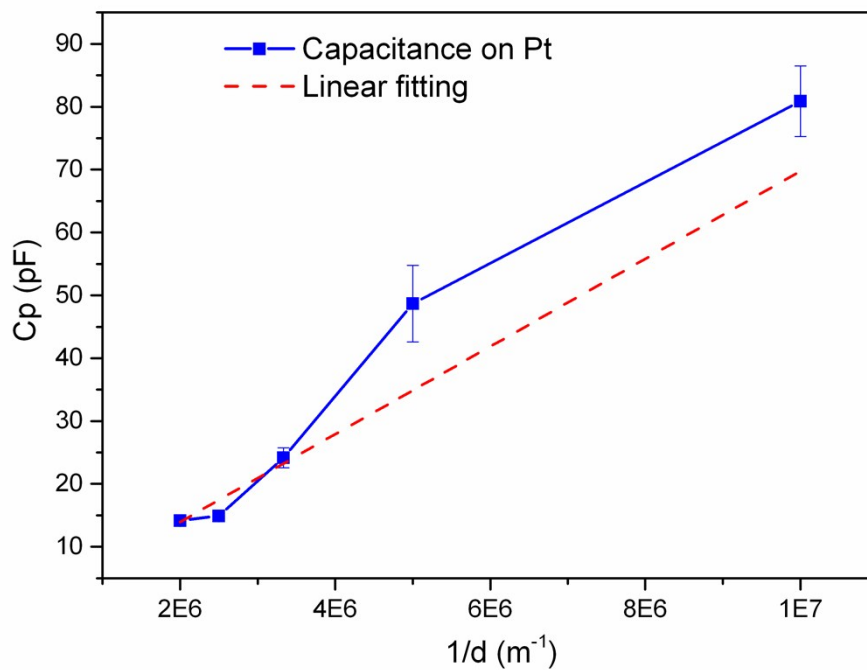

**Fig. S7 (a)** MIM capacitors structure Ag / HfO<sub>2</sub> / Pt with different thickness. **(b)** Linear fitting and curve regression for evaluation of dielectric constant.

*a)*

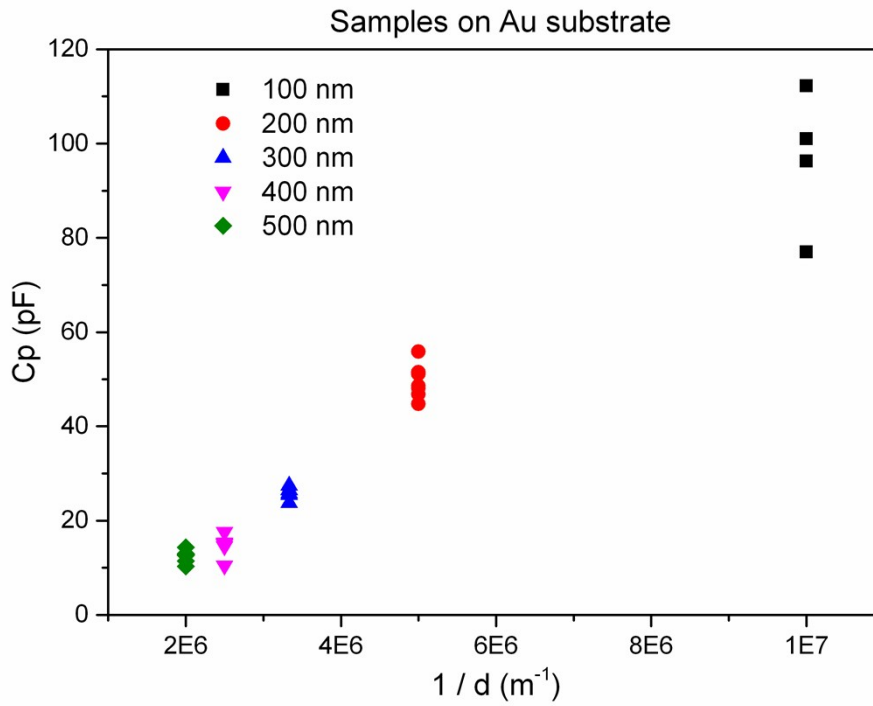

*b)*

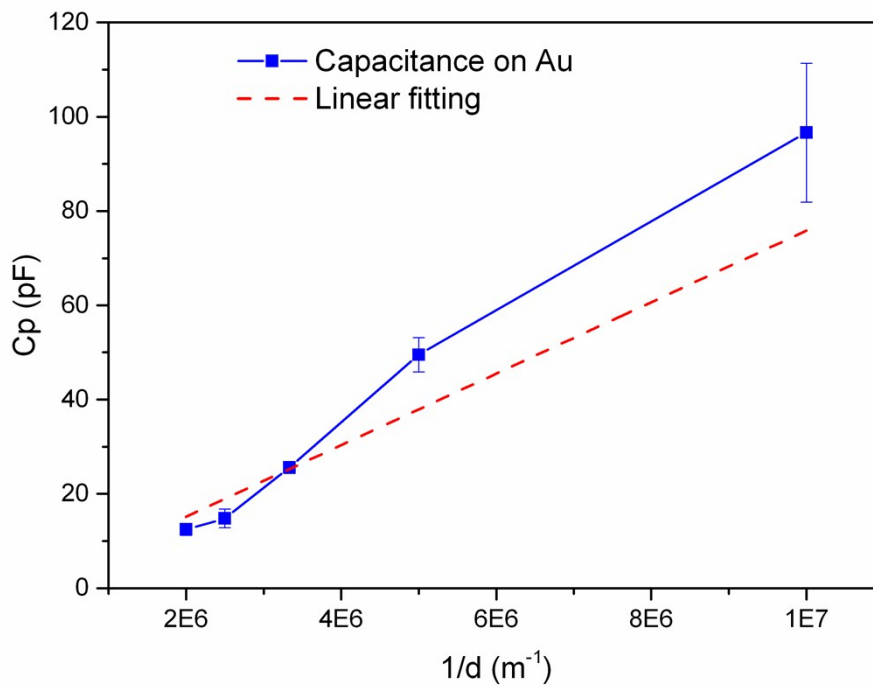

**Fig. S08** (a) MIM capacitors structure Ag / HfO<sub>2</sub> / Au with different thickness. (b) Linear fitting and curve regression for evaluation of dielectric constant.
